# Supplementary material for: Up-regulation of NCED3 and ABA biosynthesis occur within minutes of a decrease in leaf turgor but AHK1 is not required
Source: PubMed Central journal article supplement (PMC5853609; doi:10.1093/jxb/erx124), 2017-04-25
Supplement: erx124_suppl_supplementary_figures_s1_s4.pdf [file erx124_suppl_supplementary_figures_s1_s4.pdf]

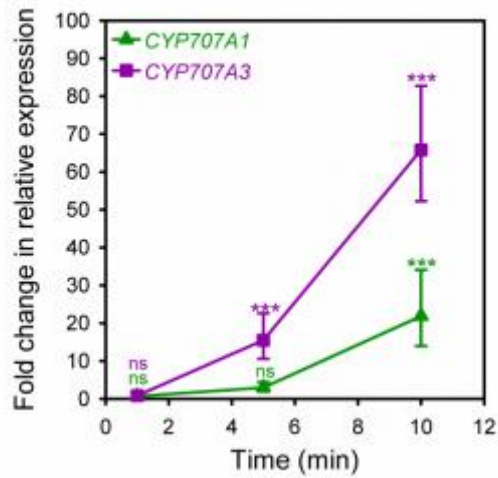

**Supplementary Figure S1:** Expression of ABA catabolism genes.

Fold change in relative gene expression in wild-type *Arabidopsis* leaves after exposure to external pressure of 1.5 MPa (at 0 min), relative to initial levels. Error bars indicate 95% CI for  $n = 3$  biological replicates. The significance of differences between  $\Delta C_T$  values (gene of interest relative to reference gene *MON1*) for samples from each timepoint compared with initial samples, as determined by ANOVA and Dunnet's 2-sided t-test, is indicated: \*\*\*,  $P \leq 0.001$ ; ns, not significant.

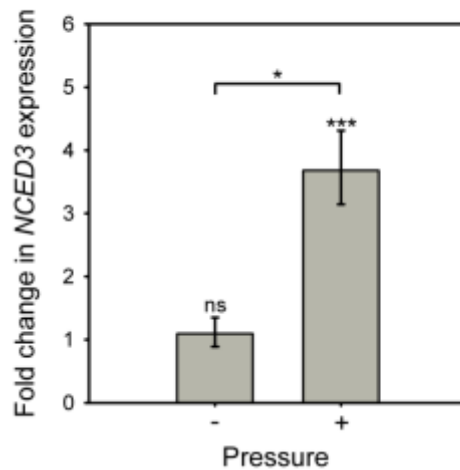

**Supplementary Figure S2:** Confirmation that *NCED3* upregulation is triggered by application of external pressure.

Fold change in *NCED3* expression in wild-type *Arabidopsis* leaves after 20 minutes in the pressure chamber without (-) and with (+) application of external pressure of 1.5 MPa, relative to initial levels. Error bars indicate 95% CI for  $n = 3-4$  biological replicates. The significance of differences between  $\Delta C_T$  values (*NCED3* relative to reference gene *MON1*) for initial samples compared with samples from final time-points, and between  $\Delta\Delta C_T$  values, as determined by t-test, is indicated: \*,  $P \leq 0.05$ ; \*\*\*,  $P \leq 0.001$ ; ns, not significant. Data for samples exposed to pressure is also shown in Fig. 2A.

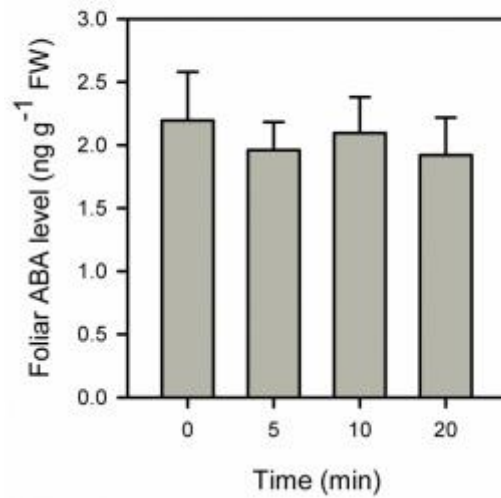

**Supplementary Figure S3:** Foliar ABA level does not change in leaves which are not exposed to external pressure.

Foliar ABA level in wild-type *Arabidopsis* leaves after containment in a Scholander pressure chamber under no external pressure. Error bars indicate SE for n = 3 biological replicates: P=0.911 by ANOVA.

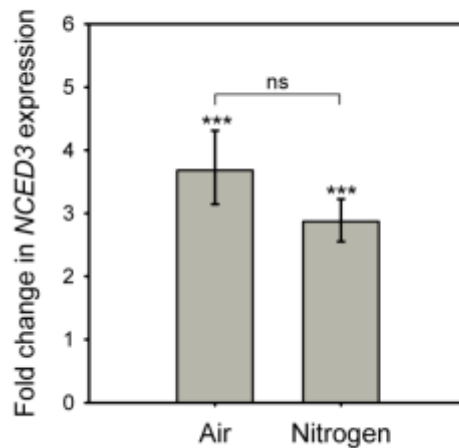

**Supplementary Figure S4:** Confirmation that *NCED3* upregulation is triggered by changes to turgor pressure and not altered CO<sub>2</sub> levels when external pressure is applied.

Fold change in *NCED3* expression in wild-type *Arabidopsis* leaves after exposure to external pressure of 1.5 MPa relative to initial levels, under air (which could potentially alter CO<sub>2</sub> levels) and nitrogen gas. Error bars indicate 95% CI for n = 3-4 biological replicates. Stars denote significant differences between  $\Delta C_T$  values (*NCED3* relative to reference gene *MON1*) for initial samples compared with samples from final time-points, as determined by t-test: \*\*\*,  $P \leq 0.001$ . A t-test confirmed no significant difference (ns) between  $\Delta\Delta C_T$  values when performed under air and nitrogen gas ( $P = 0.324$ ), showing that there is a comparable increase in *NCED3* expression induced by altered turgor under both air and nitrogen gas. Data for air is also shown in **Fig. 2A**.
